# Supplementary material for: CVD graphene based immunosensor
Source: Royal Society of Chemistry journal article supplement (doi:10.1039/c4ra03506b), 2014-01-01
Supplement: c4ra03506b1.pdf [file c4ra03506b1.pdf]

# *Supporting Information*

## **CVD graphene based immunosensor**

Adeline Huiling Loo, Adriano Ambrosi, Alessandra Bonanni\* and  
Martin Pumera\*

Division of Chemistry & Biological Chemistry, School of Physical and Mathematical Sciences,  
Nanyang Technological University, Singapore 637371

Fax: (65) 6791-1961

Email: a.bonanni@ntu.edu.sg; pumera@ntu.edu.sg

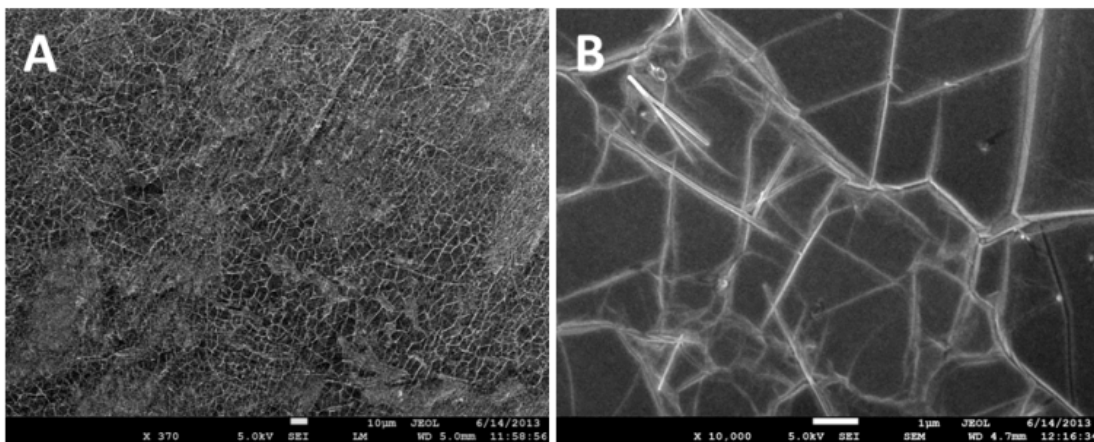

**Figure S1.** Scanning electron microscope images of commercial CVD graphene. Magnification of (A)  $370\times$  and (B)  $10\,000\times$ . Scale bars of (A)  $10\,\mu\text{m}$  and (B)  $1\,\mu\text{m}$ .

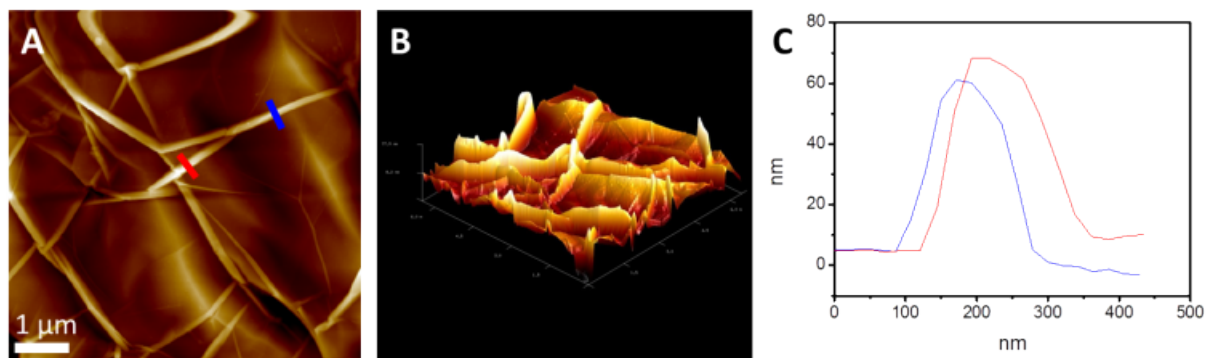

**Figure S2.** Atomic force microscopy characterization of commercial CVD graphene. (A) Two-dimensional height and amplitude profile, (B) Three-dimensional height profile and (C) Cross-sectional analysis.

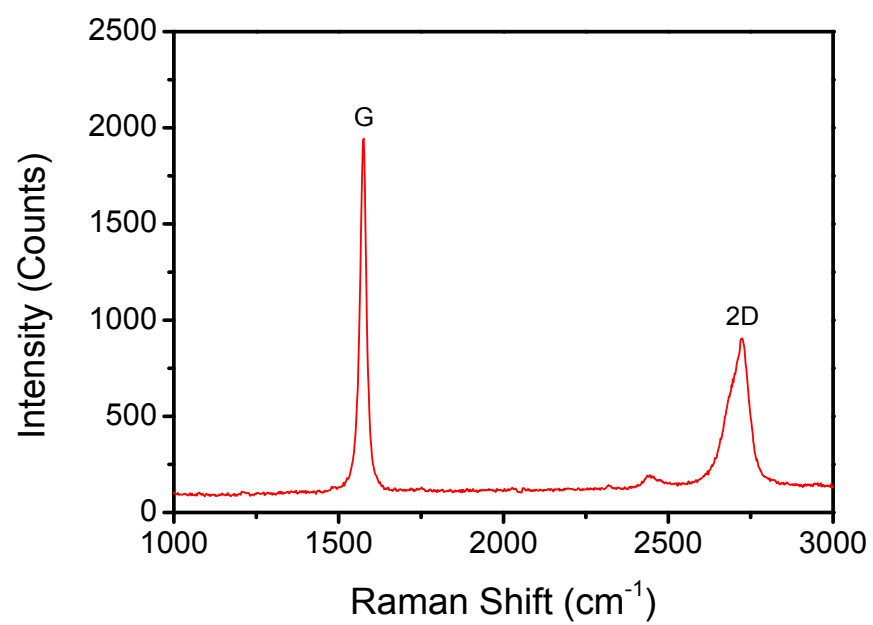

**Figure S3.** Raman spectrum of commercial CVD graphene.

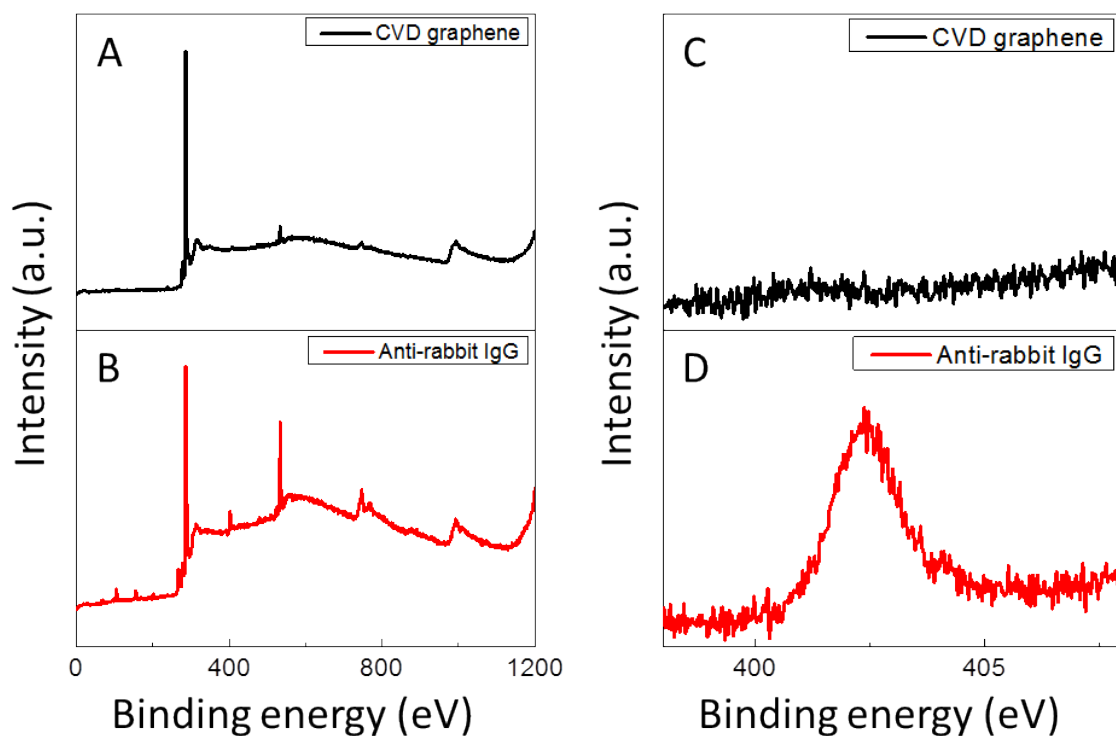

**Figure S4.** X-ray photoelectron spectroscopy characterization of commercial CVD graphene before and after anti-rabbit IgG immobilization by physical adsorption technique. (A) Wide-scan spectrum of CVD graphene, (B) Wide-scan spectrum of CVD graphene after anti-rabbit IgG immobilization, (C) High-resolution N 1s core-level spectrum of CVD graphene and (D) High-resolution N 1s core-level spectrum of CVD graphene after anti-rabbit IgG immobilization.

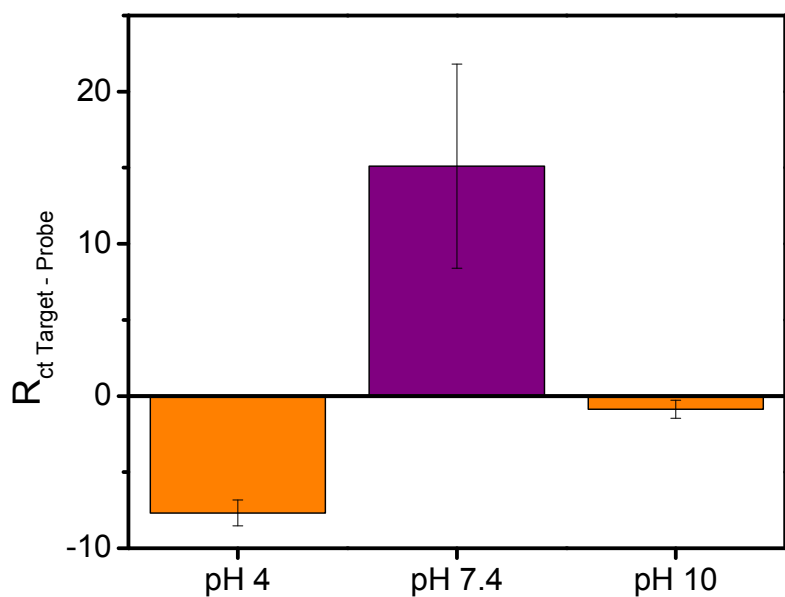

**Figure S5.** Comparison of impedimetric response towards different pH of PBS buffer solution. Signal is represented as  $R_{ct \text{ Target} - \text{Probe}}$ . The error bars relate to replicate experiments. All measurements were conducted with 10 mM  $K_4[Fe(CN)_6]/K_3[Fe(CN)_6]$  in PBS buffer solution at room temperature with Ag/AgCl as reference electrode.

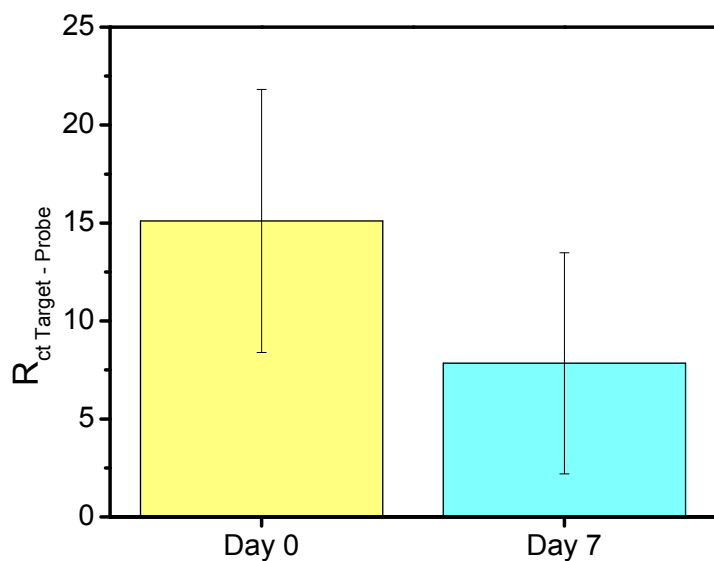

**Figure S6.** Stability study for the anti-rabbit IgG modified electrode incubated with rabbit IgG on the same day (Day 0) and after 7 days (Day 7). Signal is represented as  $R_{ct} \text{ Target} - \text{Probe}$ . The error bars relate to replicate experiments. All measurements were conducted with 10 mM  $K_4[Fe(CN)_6]/K_3[Fe(CN)_6]$  in PBS buffer solution (pH 7.4) at room temperature with Ag/AgCl as reference electrode.
